# Supplementary material
Source: PubMed Central journal article supplement (PMC10134046)
Supplement: jamapsychiatry-e230791-s002.pdf [file jamapsychiatry-e230791-s002.pdf]

## Data Sharing Statement

### Data

**Data available:** Yes

**Data types:** Other (please specify)

**Additional Information:** Phenotype weights estimated for each organ system.

**How to access data:** Phenotype weights estimated for each organ system will be made available on GitHub (<https://github.com/yetianmed/OrganHealthScore>)

**When available:** With publication

### Supporting Documents

**Document types:** Statistical/analytic code

**How to access documents:** Matlab code for conducting the core analysis will be made available on GitHub (<https://github.com/yetianmed/OrganHealthScore>)

**When available:** With publication

### Additional Information

**Who can access the data:** Anyone requesting the data

**Types of analyses:** For any purpose with appropriate ethics.

**Mechanisms of data availability:** Phenotype weights estimated for each organ system will be made publicly available on GitHub (<https://github.com/yetianmed/OrganHealthScore>)
